# Supplementary material for: Synthesis of hierarchical cobalt dendrites based on nanoflake self-assembly and their microwave absorption properties
Source: Royal Society of Chemistry journal article supplement (doi:10.1039/c6ra06112e), 2016-01-01
Supplement: c6ra06112e1.pdf [file c6ra06112e1.pdf]

## Supporting information

### Synthesis of hierarchical cobalt dendrites based on nanoflakes self-assembly and their microwave absorption properties

Xiaolei Wang<sup>ab\*</sup>, Guimei Shi<sup>a</sup>, Fa-Nian Shi<sup>a\*</sup>, Ge Xu<sup>a</sup>, Yangyuan Qi<sup>a</sup>, Da Li<sup>b</sup>,  
Zhidong Zhang<sup>b</sup>, Yajing Zhang<sup>c</sup>, Hongpeng You<sup>d</sup>

<sup>a</sup>School of Science, Shenyang University of Technology, 110870 Shenyang, PR China.

<sup>b</sup>Shenyang National Laboratory for Materials Science, Institute of Metal Research, and International Centre for Materials Physics, Chinese Academy of Sciences, Shenyang 110016, PR China.

<sup>c</sup>College of Chemical Engineering, Shenyang University of Chemical Technology, Shenyang 110142, PR China.

<sup>d</sup>State Key Laboratory of Rare Earth Resource Utilization, Changchun Institute of Applied Chemistry, Chinese Academy of Sciences, Changchun 130022, PR China.

**Corresponding authors:** Xiaolei wang<sup>1</sup>, Fa-Nian Shi<sup>2</sup>.

**E-mail address:** xlwang@alum.imr.ac.cn

fshi96@foxmail.Com

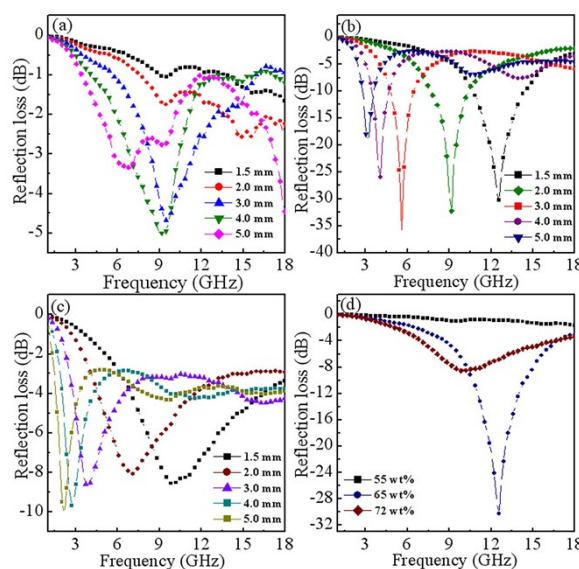

Fig. S1 Microwave reflection losses of Co dendrites/paraffin composites with different loadings of Co and thicknesses: (a) 55 wt%, (b) 65 wt%, and (c) 72 wt%; (d) Comparison of microwave reflection losses of the three samples with the same thickness of 1.5 mm.

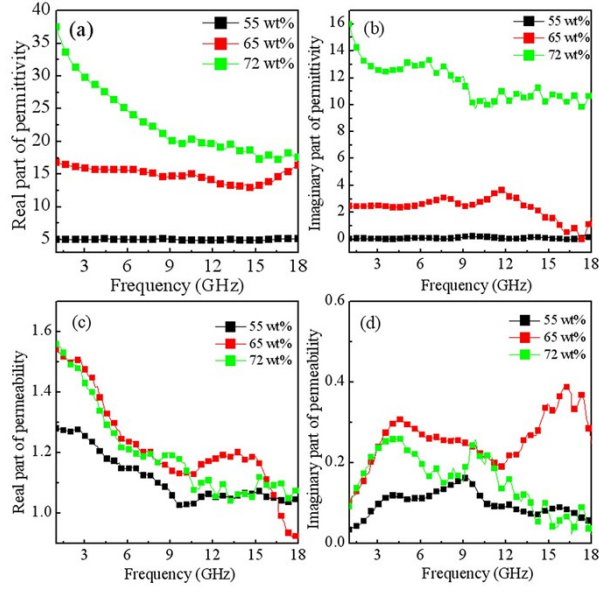

Fig. S2 Frequency dependence of the complex permittivity and the complex permeability of Co dendrites/paraffin composites with different loadings of Co: (a) real part and (b) imaginary part of the complex permittivity; (c) real part and (d) imaginary part of the complex permeability.

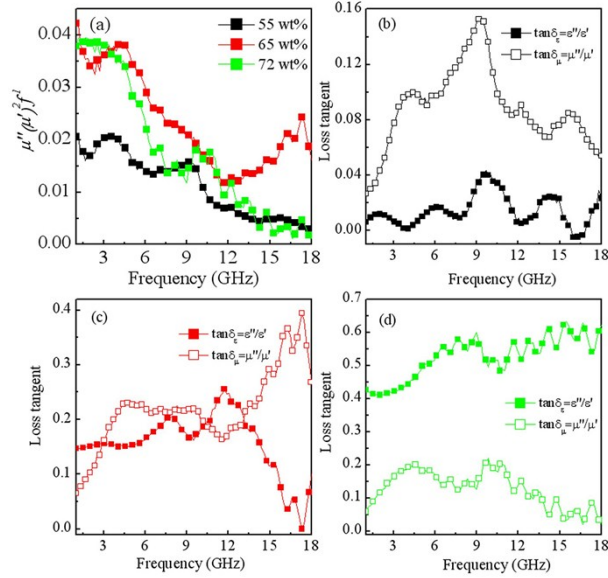

Fig. S3(a) Frequency dependence of  $\mu''\mu'^{-2}f^{-1}$  of Co dendrites/paraffin composites with different loadings of Co; dielectric loss tangent and magnetic loss tangent of Co dendrites/paraffin composites: (b) 55 wt%; (c) 65 wt%; (d) 72 wt%.

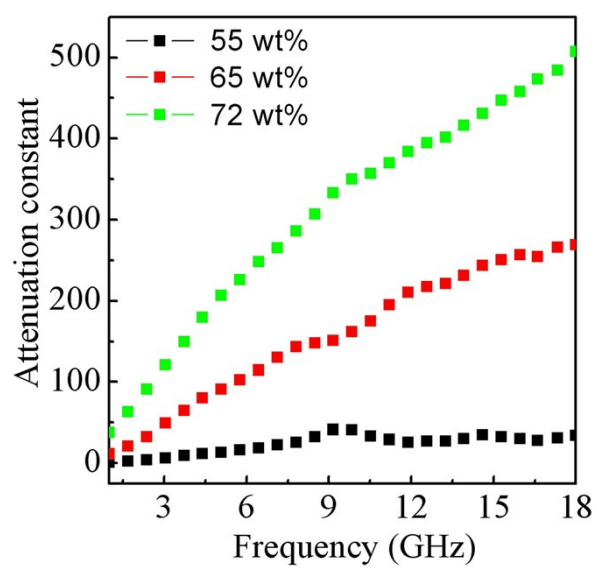

Fig. S4 Attenuation constant of the Co dendrites/paraffin composites with different Co loadings: (a) 55 wt%, (b) 65 wt%, and (c) 72 wt%.
